1

2

3

4 **Title: Intra-genome variability in the dinucleotide composition of SARS-CoV-2**

5 Paul Digard<sup>1</sup>, Hui Min Lee<sup>1</sup>, Colin Sharp<sup>1</sup>, Finn Grey<sup>1</sup>, Eleanor Gaunt<sup>1\*</sup>

6 <sup>1</sup>The Roslin Institute, The University of Edinburgh, Easter Bush Campus, Midlothian, EH25 9RG,  
7 UK

8 \*corresponding author: [Elly.Gaunt@ed.ac.uk](mailto:Elly.Gaunt@ed.ac.uk)

## 9 Abstract

10 CpG dinucleotides are under-represented in the genomes of single stranded RNA viruses, and  
11 coronaviruses, including SARS-CoV-2, are no exception to this. Artificial modification of CpG  
12 frequency is a valid approach for live attenuated vaccine development, and if this is to be applied to  
13 SARS-CoV-2, we must first understand the role CpG motifs play in regulating SARS-CoV-2  
14 replication. Accordingly, the CpG composition of the newly emerged SARS-CoV-2 genome was  
15 characterised in the context of other coronaviruses. CpG suppression amongst coronaviruses does not  
16 significantly differ according to genera of virus, but does vary according to host species and primary  
17 replication site (a proxy for tissue tropism), supporting the hypothesis that viral CpG content may  
18 influence cross-species transmission. Although SARS-CoV-2 exhibits overall strong CpG  
19 suppression, this varies considerably across the genome, and the Envelope (E) open reading frame  
20 (ORF) and ORF10 demonstrate an absence of CpG suppression. While ORF10 is only present in the  
21 genomes of a subset of coronaviruses, E is essential for virus replication. Across the *Coronaviridae*, E  
22 genes display remarkably high variation in CpG composition, with those of SARS and SARS-CoV-2  
23 having much higher CpG content than other coronaviruses isolated from humans. Phylogeny indicates  
24 that this is an ancestrally-derived trait reflecting their origin in bats, rather than something selected for  
25 after zoonotic transfer. Conservation of CpG motifs in these regions suggests that they have a  
26 functionality which over-rides the need to suppress CpG; an observation relevant to future strategies  
27 towards a rationally attenuated SARS-CoV-2 vaccine.

28

## 29 Introduction

30 CpG dinucleotides are under-represented in the DNA genomes of vertebrates (Cooper and Krawczak  
31 1989; Simmonds, et al. 2013). Cytosines in the CpG conformation may become methylated, and this  
32 methylation is used as a mechanism for transcriptional regulation (Medvedeva, et al. 2014).  
33 Methylated cytosines have a propensity to undergo spontaneous deamination (and so conversion to a  
34 thymine). Over evolutionary time, this has reduced the frequency of CpGs in vertebrate genomes  
35 (Cooper and Krawczak 1989). However, loss of CpGs in promoter regions would affect  
36 transcriptional regulation, and so CpGs are locally retained, resulting in functionally important ‘CpG  
37 islands’ found in around half of all vertebrate promoter regions (Deaton and Bird 2011).

38 Single strand RNA (ssRNA) viruses infecting vertebrate hosts reflect the CpG dinucleotide  
39 composition of their host in a type of mimicry (Simmonds, et al. 2013). It was hypothesised that this  
40 is because vertebrates have evolved a CpG sensor which flags transcripts with aberrant CpG  
41 frequencies (Atkinson, et al. 2014; Gaunt, et al. 2016). This idea was strengthened by the discovery  
42 that the cellular protein Zinc-finger Antiviral Protein (ZAP) binds CpG motifs on viral RNA and  
43 directs them for degradation (Takata, et al. 2017), and further supported by observations that CpGs  
44 can be synonymously introduced into a viral genome to the detriment of virus replication without  
45 negatively impacting transcriptional or translational efficiency (Tulloch, et al. 2014; Gaunt, et al.  
46 2016). Current understanding is therefore that ssRNA viruses mimic the CpG composition of their  
47 host at least in part to subvert detection by ZAP. ssRNA viruses also under-represent the UpA  
48 dinucleotide, but to a far more modest extent (Simmonds, et al. 2013), and the reasons behind UpA  
49 suppression are less well understood. A consequence of dinucleotide bias is that certain codon pairs  
50 are under-represented (Tulloch, et al. 2014; Kunec and Osterrieder 2016) (so, for example, codon  
51 pairs of the conformation NNC-GNN are among the most rarely seen codon pairs in vertebrates (Tats,  
52 et al. 2008)). Whether the two phenomena of CpG suppression and codon pair bias (CPB) are discrete  
53 remains controversial (Futcher, et al. 2015; Kunec and Osterrieder 2016; Groenke, et al. 2020).

54 The *Coronaviridae* have a generally low genomic cytosine content (Berkhout and van Hemert 2015),  
55 but as with other ssRNA viruses, nonetheless still under-represent CpG dinucleotides to a frequency  
56 below that predicted from individual base frequencies of cytosine and guanine (Woo, et al. 2007).

57 The Coronavirus family comprises four genera – the alpha, beta, gamma and delta-coronaviruses.  
58 Human-infecting coronaviruses (HCoVs) have been identified belonging to the alpha and beta genera  
59 (Hu, et al. 2015). Alphacoronaviruses infecting humans include HCoV-229E and the more recently  
60 discovered HCoV-NL63 (van der Hoek, et al. 2004). Betacoronaviruses include HCoV-OC43, HCoV-  
61 HKU1 (Woo, et al. 2005), severe acute respiratory syndrome (SARS)-CoV (Rota, et al. 2003), Middle  
62 East respiratory syndrome (MERS)-CoV (Zaki, et al. 2012) and the recently emerged SARS-CoV-2  
63 (Lu, et al. 2020; Zhu, et al. 2020). Prior to the emergence of SARS-CoV-2, SARS-CoV had the  
64 strongest CpG suppression across human-infecting coronaviruses (Woo, et al. 2007). The reason(s)  
65 for this are uncertain, but loss of CpG from a virus genome upon zoonotic transfer into the human  
66 host has previously been reported for influenza A virus (Greenbaum, et al. 2008), potentially  
67 indicating an advantage of reduced CpG content for infection of the human respiratory tract. All  
68 human-infecting coronaviruses are thought to be derived from ancestral bat viruses, though  
69 intermediate hosts may have facilitated zoonotic passage in some cases (Banerjee, et al. 2019).

70 During replication, coronaviruses synthesise transcriptionally active negative sense sub-genomic  
71 RNAs which are of varying length. Sub-genomic RNAs are synthesised by the viral polymerase  
72 copying the genome up to a 5' leader sequence (Liao and Lai 1994) which is repeated upstream of  
73 most open reading frames (ORFs) in the coronavirus genome (such repeats are referred to as  
74 transcription regulation sequences (TRSs)); this complementarity allows viral polymerase jumping  
75 from the 5' leader sequence to directly upstream of ORFs preceded by a TRS (Sawicki and Sawicki  
76 1998). The negative sense sub-genomic RNAs serve as efficient templates for production of mRNAs  
77 (Sawicki, et al. 2007). Generally, only the first ORF of a sub-genomic mRNA is translated (Perlman  
78 and Netland 2009), although leaky ribosomal scanning has been reported as a means for accessing  
79 alternative ORFs for several coronaviruses including SARS-CoV (Schaecher, et al. 2007).

80 SARS-CoV-2 was recently reported to have a CpG composition lower than other members of the  
81 betacoronavirus genus, comparable to certain canine alphacoronaviruses; an observation used to draw  
82 inferences over its origin and/or epizootic potential (Xia 2020). Here we show that coronaviruses have  
83 a broad range of CpG composition which is partially host and tissue tropism dependent, and that there  
84 is no difference in CpG content across coronavirus genera. There is however a striking disparity in  
85 CpG composition between SARS-CoV-2 ORFs, with the Envelope (E) protein ORF and ORF10 over-  
86 representing CpG dramatically. E ORF and ORF10 also have higher UpA dinucleotide composition  
87 and lower CPB scores than other ORFs. E ORF displays CpG suppression in all human-infecting  
88 viruses except SARS-CoV and SARS-CoV-2, suggesting a potential correlation between CpG  
89 presentation and disease severity in human-infecting coronaviruses.

90

## 91 Results

92 **CpG suppression within coronavirus genomes varies between host species and tissue tropism**  
93 **but not between genera.** The genomic CpG composition of all complete genome coronavirus  
94 sequences ( $n = 3407$ ; downloaded and further processed as described in the methods section and **Fig**  
95 **1**) were calculated using observed: expected (O:E) ratios, with any value below 1 indicating CpGs are  
96 under-represented relative to the genomic content of cytosine and guanine bases. A substantial range  
97 in GC content (from  $\sim 0.32 - 0.47$ ) was seen across the *Coronaviridae*, and as expected, all viruses  
98 exhibited some degree of CpG suppression, with CpG O:E ratios ranging from 0.37 to 0.74 (**Fig 2A**).  
99 To investigate the root of this variation, the coronavirus sequence dataset was refined to remove  
100 sequences with more than 90% nucleotide identity to reduce sampling biases (so, for example, SARS-

101 CoV sequences of human origin were stripped from over 1000 representative sequences to just one).  
102 The CpG compositions of the remaining 215 sequences (**Table S1**) were compared between  
103 coronavirus genera (alpha, beta, gamma and delta). For the 215 representative sequences, a genus  
104 could be assigned for 203. No differences in CpG composition between coronavirus genera were  
105 apparent, although the gamma genus exhibited a tighter range (**Fig 2B**). Next, we examined whether  
106 differences in CpG composition between viruses isolated from different hosts explained the range in  
107 CpG composition across the *Coronaviridae*. For the 215 representative sequences, a host could be  
108 assigned to 210. Coronavirus sequences were divided into host groups, and groups with at least three  
109 divergent sequences were compared; this included bat, avian, camelid, canine, feline, human,  
110 mustelid, rodent, swine and ungulate viruses. Variation in CpG composition between coronaviruses  
111 detected in different host species was evident across groups ( $p = 0.0057$ ) and between groups, with  
112 coronaviruses detected in canine and human species having lower CpG content and rodent and bat  
113 coronaviruses having the highest (**Fig. 2C**). Significant differences in CpG composition were detected  
114 between bat and canine ( $p = 0.0001$ ), avian and rodent ( $p = 0.005$ ), canine and mustelid ( $p = 0.011$ ),  
115 canine and rodent ( $p < 0.0001$ ), human and rodent ( $p = 0.002$ ), and rodent and ungulate ( $p = 0.0026$ )  
116 viruses. All frequency ranges overlapped however, indicating viral CpG frequency alone seems to be  
117 a poor predictor of virus origin, contradicting the recent suggestion of a canine origin of SARS-CoV-2  
118 (Xia 2020). Where sequences in a host group representative of both alpha and betacoronaviruses were  
119 available (which was the case for bat, camelid, canine, human, rodent and swine viruses), these  
120 sequences were split by genus and compared to determine whether coronavirus genera influenced  
121 coronavirus CpG frequencies in a host species-specific manner. By this method, the lack of difference  
122 in CpG composition of coronaviruses of different genera was maintained (**Fig. 2D**).

123 To test the hypothesis that coronavirus CpG content varies according to tissue tropism (Xia 2020), we  
124 classified the viruses according to their primary site of replication, where this was known or could be  
125 inferred from the sampling route. Samples were split into five categories – ‘respiratory’, ‘enteric’,  
126 ‘multiple’, ‘other’, or ‘unknown’. Altogether, 206 of the 215 sequences were classifiable (detailed in  
127 **Table S1**), with 9 sequences categorised as ‘unknown’ and excluded from further analyses. By this  
128 admittedly inexact approach, viruses infecting the respiratory tract had a significantly lower mean  
129 CpG composition than viruses with enteric tropism ( $p = 0.032$ ; **Fig. 2E**). However, the spread of  
130 respiratory virus CpG frequencies was contained entirely within the range exhibited by enteric  
131 viruses. Furthermore, 124 sequences were assigned to the enteric group, and only 22 to the respiratory  
132 group. Of these 146 sequences, bat viruses accounted for 80, all of which were assigned to the enteric  
133 group (despite reasonable sampling of respiratory tract in bats) and this cohort of viruses maintained  
134 almost the full spread of CpG frequencies (**Fig. 2E, Table S1**). Thus, while coronavirus CpG  
135 frequency may show some correlation with replication site, the dataset available does not permit  
136 strong conclusions to be drawn or predictions about zoonotic potential to be made.

137 **Heterogeneities in the dinucleotide composition of SARS-CoV-2.** By our methods for calculating  
138 CpG O:E ratios, SARS-CoV-2 has a genomic CpG ratio of 0.408 (representing the mean of 1163  
139 complete genome sequences). This is similar to the value calculated previously for a much smaller  
140 sample ( $n = 5$ ) of SARS-CoV-2 sequences (Xia 2020). As this previous study noted, this is at the  
141 bottom end of the range of genomic CpG O:E ratios for betacoronaviruses and for coronaviruses  
142 detected in humans (**Figs 2B, C and D**). However, as noted above, vertebrate DNA genomes contain  
143 localised islands of higher CpG content (Deaton and Bird 2011). To determine if similar  
144 heterogeneity in CpG frequency was evident in the SARS-CoV-2 genome, the composition of  
145 individual ORFs was examined. Overall, most ORFs had CpG O:E ratios which were comparable to  
146 the genomic CpG ratio. However, two ORFs in particular, E ORF and ORF10, had CpG ratios higher  
147 than 1, indicating an absence of CpG suppression in those regions (**Fig. 3A**). These two ORFs also did  
148 not suppress the UpA dinucleotide, in contrast with other SARS-CoV-2 ORFs (**Fig. 3B**).

149 Due to the difficulties in distinguishing between dinucleotide bias and CPB, CPB scores were also  
150 calculated for each ORF and plotted against CpG composition (**Fig. 3C**). CPB scores provide an  
151 indication of whether the codon pairs encoded in each ORF are congruous with usage in vertebrate  
152 genomes. A score below 0 indicates use of codon pairs that are disfavoured in host ORFs. An  
153 approximately linear relationship between CpG O:E ratio and CPB score for each SARS-CoV-2 ORF  
154 was apparent ( $R^2 = 0.80$ ). E ORF and ORF10 both had negative CPB scores, indicating that they use  
155 under-represented codon pairs and in keeping with the observation that both ORFs over-represent  
156 CpG and UpA dinucleotides.

157 To examine the precise location of the CpG hotspots, a sliding window analysis of CpG content  
158 across the 3' end of the SARS-CoV-2 genome (averaged over 1163 complete genome sequences) as  
159 well as the closely related bat and pangolin sequences was performed. As expected, marked increases  
160 in CpG O:E ratio were observed concomitant with the genomic regions associated with E ORF and  
161 ORF10 (**Fig. 3D**). The E ORF and ORF10 regions associated with high CpG composition were  
162 maintained across the bat, pangolin and human sequences, indicating that since the bat sample was  
163 collected in 2013, the higher CpG frequency in this region has not been negatively selected. While the  
164 increase in CpG presentation was apparent across the entire E ORF, starting at the 3' end of ORF3  
165 and ending at the beginning of the M gene, the CpG spike in ORF10 was more narrowly associated  
166 with the putative coding region. Additionally, a CpG spike between the 3'-end of ORF8 and the 5'-  
167 end of the N gene was evident. The 5'-end of the N ORF also contains the overlapping ORF9b gene,  
168 which when considered alone, has a CpG O:E ratio approaching 1 (**Fig. 3A**), and is the ORF with the  
169 third-highest CpG O:E ratio after E ORF and ORF10. The usual coding plasticity afforded to  
170 nucleotides in the third position of a codon is nullified when overlapping reading frames are present,  
171 and so the CpG spike at this gene boundary is not surprising. Thus, although the SARS-CoV-2  
172 genome exhibits high CpG suppression overall, there are local heterogeneities associated with  
173 individual ORFs, most notably E.

174 **On the origins of the high CpG content of E ORF of SARS-CoV-2.** To determine whether the high  
175 CpG content of E ORF is evolutionarily conserved (ORF10 is poorly conserved and only encoded by  
176 a subset of SARS-like coronaviruses, so it was not analysed), attempts to identify the E ORF by  
177 nucleotide alignment for the set of 215 coronavirus sequences was undertaken, compared with E  
178 ORFs already annotated in NCBI. Of the 215 sequences, E ORF was identifiable in 178, with the  
179 remaining sequences too divergent to be confident of gene assignment. CpG composition for E ORF  
180 for the 178 sequences was measured and plotted according to host (**Fig. 4A**). A diverse distribution of  
181 CpG content was evident in viruses from every host group except ungulates, with bats in particular  
182 displaying a notable range from total suppression to overrepresentation. Otherwise, most viruses from  
183 most species still maintained some level of CpG suppression in E ORF. Overall, there was a  
184 significant difference between the mean CpG O:E ratio across host groups by 1-way ANOVA ( $p <$   
185  $0.0001$ ), but no significant differences were identified in pairwise comparisons of viral CpG  
186 compositions between hosts. The exceptions with high CpG O:E ratios in E ORF were four avian  
187 coronaviruses and notably, SARS-CoV and SARS-CoV-2. In contrast, other human-infecting  
188 coronaviruses (HCoV-229E, HCoV-HKU1, HCoV-NL63 and HCoV-OC43) all strongly under-  
189 represented CpG in E ORF, while MERS-CoV E ORF had an intermediate CpG O:E ratio of 0.6. To  
190 confirm E ORF over-represented CpG relative to the rest of the genome in SARS-CoV and SARS-  
191 CoV-2, ratios for E ORF: genomic CpG O:E were calculated (**Fig. 4B**). In non-bat non-avian host  
192 genomes, E ORF usually displayed CpG suppression in line with or stronger than that seen at the  
193 genome level, whereas SARS-CoV and SARS-CoV-2 starkly contrasted with this, displaying far less  
194 CpG suppression in this region.

195 To investigate the evolutionary history of E ORF CpG composition in the human-infecting  
196 coronaviruses, a phylogenetic reconstruction of all 7 human coronavirus and 96 bat coronavirus E  
197 genes was performed to determine whether CpG ratios in this region were ancestrally derived. As

198 expected (Cotten, et al. 2013; Lu, et al. 2020), the human viruses were interspersed among the bat  
199 viruses, reflective of their independent emergence events (**Fig. 4C**). The CpG compositions of the  
200 human coronavirus E ORFs, although diverse, were similar to the CpG compositions of their nearest  
201 bat relatives, demonstrating that CpG composition in E ORF is an ancestrally derived trait selected  
202 prior to emergence in the human population.

203

## 204 **Discussion**

205 We have examined the CpG O:E ratios of all the currently available complete genome sequences of  
206 coronaviruses and uncovered a noteworthy diversity. Generally, the CpG O:E ratio of coronavirus  
207 genomes from a single host species varied considerably. For bats, which serve as a coronavirus  
208 reservoir (Banerjee, et al. 2019) and which had the largest number of representative sequences, the  
209 CpG O:E range was from 0.41 to 0.70, demonstrating the genome plasticity of coronaviruses and  
210 indicating that their evolution is not overtly restricted by a requirement to minimise CpG composition  
211 in the natural reservoir. The antiviral CpG-detector protein, ZAP (Takata, et al. 2017), has been  
212 identified as a target for several viral proteins including the 3C protease of enterovirus 71 (Xie, et al.  
213 2018) and NS1 of influenza A virus (Tang, et al. 2017) – two viruses with overall low CpG content  
214 (Atkinson, et al. 2014; Gaunt, et al. 2016). This highlights the importance of CpG as a pathogen-  
215 associated molecular pattern (PAMP), and so this diversity in CpG expression within the  
216 *Coronaviridae* is striking. If coronaviruses also produce a protein with anti-ZAP activity, it is possible  
217 that this has variable efficacy between strains, explaining the ability of coronaviruses to fluctuate CpG  
218 composition considerably. Alternatively (or in addition), this may be host driven; we show that  
219 average CpG suppression varies with host species (**Fig 2C**) and, as previously suggested (Xia 2020),  
220 this may be linked with ZAP expression levels. We have demonstrated that CpG variation is not  
221 related to viral taxonomic grouping (**Fig. 2B**) but we did find an association between viral CpG  
222 composition and primary replication site, with respiratory coronaviruses having a lower CpG  
223 composition than enteric ones (**Fig. 2E**). This is the opposite of what has been previously suggested  
224 (Xia 2020), though this proposal was not supported by any comprehensive investigation.  
225 Nevertheless, our meta-analysis was subject to the sampling preferences of many labs who have  
226 performed surveillance for coronaviruses, and many of the tissue tropism assignments we made have  
227 not been verified by experimental infections. Another limitation of this analysis is that only sequences  
228 of greater than 10% divergence were included. Tissue tropism can be defined by much smaller  
229 differences; for example, a deletion in the spike protein of transmissible gastroenteritis virus (a  
230 porcine coronavirus) altered the tropism of the virus from enteric to respiratory, while nucleotide  
231 identity was preserved at 96% (Cox, et al. 1990; Rasschaert, et al. 1990). Further study on tissue  
232 tropisms of coronaviruses, as well as tissue expression profiles and antiviral activities of ZAP are  
233 needed to validate these analyses.

234 Loss of CpG motifs during adaptation to the human host has been previously described for influenza  
235 A virus (Greenbaum, et al. 2008), highlighting the importance of CpG composition for host  
236 adaptation. For SARS-CoV-2, we determined a genomic CpG O:E ratio of 0.408, which is similar to  
237 the human genome CpG O:E ratio of 0.2-0.4 (McClelland and Ivarie 1982; Sved and Bird 1990;  
238 Tomso and Bell 2003). Mimicry of the CpG composition of the host by ssRNA viruses is considered a  
239 mechanism to subvert detection by the innate immune response (Simmonds, et al. 2013; Takata, et al.  
240 2017) and speculatively this may indicate that SARS-CoV-2 was genetically predisposed to make a  
241 host switch into humans. Similarly, the genomic CPB score of 0.048 indicates that SARS-CoV-2 uses  
242 codon pairs which are preferentially utilised in the human ORFeome, which may mean that the virus  
243 was well suited for translational efficiency in humans at its time of emergence.

244 In coding regions which do not have overlapping ORFs, there is no requirement at the coding level for  
245 CpG motifs to be retained (Kanaya, et al. 2001). E ORF and ORF10 are not known to be in

246 overlapping reading frames; conversely, ORF9b overlaps with the ORF for nucleocapsid (N). Some  
247 CpG retention in this region is therefore inevitable and may explain the high CpG composition of  
248 ORF9b. This nevertheless leaves open the question of why CpG motifs are retained in the E ORF and  
249 ORF10 regions (if this is not an ancestrally derived evolutionary hangover; as CpGs have not been  
250 lost from these regions between 2013 and now (**Fig. 3D**), this seems unlikely). CpG motifs may serve  
251 various non-exclusive purposes, including providing secondary structure (Rima and McFerran 1997),  
252 intentionally stimulating ZAP activity (by analogy with multiple viruses intentionally triggering NF-  
253 kB (Hiscott, et al. 2001)), or providing m5c methylation sites (Squires, et al. 2012; Khoddami and  
254 Cairns 2013; Dev, et al. 2017).

255 It is also possible that CpG enrichment serves as a strategy for regulating translation. Conceivably, the  
256 high CpG content at the 5' end of the E ORF transcript destines this for degradation via ZAP or CBP-  
257 associated mechanisms (Guo, et al. 2007; Groenke, et al. 2020) more rapidly than other viral  
258 transcripts. This could be intentional, or an evolutionarily accepted trade-off to preserve a higher  
259 importance role for CpGs. Alternatively, E ORF and ORF10 proteins may only be required late during  
260 infection (parallels with which can be drawn from the differential temporal expression and  
261 translational efficiencies of transcripts of the coronavirus mouse hepatitis virus strain A59 (Irigoyen,  
262 et al. 2016)), by which time an as-yet unidentified inhibitor of ZAP (or other CpG/CBP sensor(s))  
263 may render CpG suppression unnecessary, as suggested for human cytomegalovirus (Lin, et al. 2020).

264 ORF9b and ORF10 do not have their own TRSs and so whether or how these open reading frames are  
265 accessed is currently controversial; nevertheless, peptides from both have been identified by mass  
266 spectrometry from SARS-CoV-2 infected cells (Davidson, et al. 2020). The ORF9b AUG  
267 transcription initiation site, which has a strong Kozak context (Kozak 1986), is the first AUG after  
268 and 10 nucleotides downstream of the initiation site for N ORF (which displays moderate Kozak  
269 context). It is therefore credible to think that ORF9b is accessed via leaky ribosomal scanning - a well  
270 characterised method for accessing alternative ORFs used by coronaviruses and other viruses (Lin and  
271 Lo 1992; Chenik, et al. 1995; Schneider, et al. 1997; Senanayake and Brian 1997; O'Connor and Brian  
272 2000; Ryabova, et al. 2006; Firth and Atkins 2010; Wise, et al. 2011; Irigoyen, et al. 2016). There is a  
273 lack of evidence that ORF10 is accessed via production of its own subgenomic RNA (Kim, et al.  
274 2020); possibly, this ORF is accessed via leaky scanning from the leader immediately preceding the N  
275 ORF. However, visual inspection of the SARS-CoV-2 genome indicated that the AUG encoding  
276 ORF10 is 24 AUGs downstream from the one initiating N ORF, making this hypothesis speculative at  
277 best. Whether the anomalous CpG composition of ORF10 is somehow involved in priming its  
278 transcription remains to be determined.

279 The transcript encoding E ORF incorporates an additional ~3.4kb of RNA and ORF10, if accessed  
280 from the transcript produced from the TRS upstream of N ORF, is present on a transcript of  
281 approximately 1.6kb in length. Whether the described CpG enriched regions are relevant as PAMPs in  
282 these contexts is currently unclear from what is known about ZAP recognition of CpG motifs. It is  
283 also worth noting that the body TRS sequence ahead of the E gene is relatively weak in SARS-CoV-2,  
284 as it is in SARS-CoV (Marra, et al. 2003), suggesting that this subgenomic mRNA may be of  
285 relatively low abundance. Of the SARS-CoV-2 transcripts which use a canonical TRS for synthesis,  
286 the donor site upstream of E ranked seventh when comparing sequencing read frequency across this  
287 site (behind reads spanning the TRS sites upstream of N, spike, ORF7a, ORF7b, ORF3a, ORF8 and  
288 M ORF respectively) in Vero cells infected at a low MOI for 24 hours, indicating that E ORF is of  
289 lower abundance than most other transcripts (Kim, et al. 2020). It is therefore possible that E ORF is  
290 of sufficiently low abundance for a high CpG frequency to be physiologically inconsequential.  
291 Similar logic can be applied to ORF10, which is just 117 nucleotides in length.

292 Synonymous addition of CpGs into a virus genome has been suggested as a potential novel approach  
293 to vaccine development by us and others (Burns, et al. 2009; Atkinson, et al. 2014; Gaunt, et al. 2016;

294 Moratorio, et al. 2017). Here we explore the evolutionary space occupied by coronaviruses in the  
295 context of their CpG composition and find that SARS-CoV-2 has a low CpG composition in  
296 comparison with other coronaviruses, but with CpG ‘hotspots’ in genomically disparate regions. This  
297 highlights the potential for large scale recoding of the SARS-CoV-2 genome by introduction of CpGs  
298 into multiple regions of the virus genome as a mechanism for generation of an attenuated live vaccine.  
299 Introduction of CpG into multiple sites could also be used to subvert the potential of the virus to  
300 revert to virulence through recombination. A challenge of live attenuated vaccine manufacture is to  
301 enable sufficient production of a vaccine virus that has a replication defect. Strategic introduction of  
302 CpGs into specific regions of the virus genome has the potential to negate a replication defect in ZAP  
303 knockout cells, if regions such as conserved secondary structures and overlapping reading frames are  
304 avoided (Ficarelli, et al. 2019; Odon, et al. 2019), thus allowing the generation of high titre  
305 replication-defective vaccine virus stocks.

306

## 307 **Materials and Methods**

308 **Sequences.** For a comparison of GC content versus CpG ratio, all SARS-CoV-2 complete genome  
309 sequences of high coverage (as defined on the GISAID website) were downloaded from GISAID  
310 ([www.gisaid.org](http://www.gisaid.org)) on 26 March 2020 (1163 sequences in total) and aligned against the SARS-COV-2  
311 reference sequence (Accession number NC\_045512) using Simmonics software (Simmonds 2012)  
312 SSE v1.4 (pre-release download kindly provided by Prof. Peter Simmonds, Oxford University). All  
313 sequences represented human isolates except for one sequence of bat origin (hCoV-  
314 19/bat/Yunnan/RaTG13/2013; EPI\_ISL\_402131) and one sequence from a pangolin (hCoV-  
315 19/pangolin/Guangdong/1/2019; EPI\_ISL\_410721). All complete genome sequences of all  
316 coronaviruses were downloaded from NCBI on the 16 April 2020 (3407 sequences in total).  
317 Sequences were then aligned and sequences less than 10% divergent at the nucleotide level, identified  
318 using the ‘identify similar/ identical sequences’ function in SSE v1.4 were removed from the dataset.  
319 Sequences were annotated into animal groups and genera based on their description in the NCBI  
320 database. The trimmed dataset (**Table S1**) included 215 complete genome coronavirus sequences.  
321 Individual groups were made for sequences originating from the following hosts: bat ( $n = 108$ ), avian  
322 (35), camelid (3), canine (7), feline (9), human (7), mustelids (5), rodents (8), swine (15), ungulates  
323 (9) and ‘other’ (which included bottle-nosed dolphin (2), hedgehog (2), rabbit (2), beluga whale (1),  
324 civet (1) and pangolin (1)). Groups were loosely defined based on taxonomic orders, with some  
325 exceptions made to examine our specific research questions. Bats are of the order Chiroptera; multiple  
326 avian orders were grouped together (Galliformes, Anseriformes, Passeriformes, Gruiformes,  
327 Columbiformes and Pelicaniformes); even toed (Artiodactyla) and odd toed (Perissodactyla) ungulate  
328 orders were grouped, with camelids analysed separately due to their association with MERS-CoV  
329 (Azhar, et al. 2014); Canidae (canine) and Pantherinae (feline) sequences of the Carnivora order were  
330 analysed separately, as canines have previously been suggested as an intermediate host species for  
331 SARS-CoV-2 (Xia 2020) and cat infections with SARS-CoV-2 have been reported (Shi, et al. 2020);  
332 humans were the only representatives from the Primate order; all remaining Carnivora, with the  
333 exception of a single civet sequence, belonged to the Mustelidae (mustelids); rodents belong to the  
334 Rodentia order; and swine belong to the Artiodactyla order; whales are also Artiodactyla but swine  
335 were considered separately due to considerable interest in porcine coronaviruses (Vlasova, et al.  
336 2020). Sequences were also annotated for genus by reference to the NCBI description (203 of the 215  
337 sequences were assigned to a genus), and for primary replication site by literature reference (refer to  
338 **Table S1**). Replication site annotations were based on the sample type from which a coronavirus  
339 sequence was obtained – ‘enteric’ for faecal/ gastrointestinal samples, ‘respiratory’ for nasal,  
340 oropharyngeal and other respiratory samples; ‘multiple’ if samples from multiple systems tested  
341 positive, ‘other’ if the sample was collected from a site not falling into the enteric or respiratory  
342 categories (e.g. brain), or ‘unknown’ if a sample type could not be determined. If only one sampling



343 route was tested and returned a positive result, the sequence was categorised in accordance with the  
344 sole sampling route. The sequence datasets used in this paper are summarised in **Fig. 1**.

345 **Analyses of dinucleotide content.** CpG and UpA composition of complete genomes or of individual  
346 ORFs were calculated using the composition scan in SSE v1.4. CpG frequencies were measured as  
347 observed: expected (O:E) ratios, using the formula  $f(\text{CpG})/f(\text{C}) \cdot f(\text{G})$ . Individual ORFs were  
348 identified using a combination of ORF finder (<https://www.ncbi.nlm.nih.gov/orffinder/>), visual  
349 inspection of nucleotide alignments in SSE v1.4, comparison with previous literature and information  
350 available from nextstrain.org. Sliding window analyses were performed on the 1163 aligned SARS-  
351 CoV-2 sequences and the related bat and pangolin sequences by performing composition scans in SSE  
352 v1.4 for 100 nucleotide genomic regions, at 25 nucleotide iterations. For the SARS-CoV-2 sequences,  
353 mean CpG O:E ratios for each window were calculated. CPB (Gutman and Hatfield 1989) scores  
354 across the SARS-CoV-2 ORFeome were calculated using the SSE v1.4 composition scan function.  
355 Individual ORFs were concatenated with a separating 'NNN' codon for analysis, and secondary  
356 overlapping ORFs were not included due to coding constraints imposed in these regions.

357 **Phylogenetic analyses.** E ORFs were aligned in MEGA X (Kumar, et al. 2018) using the Clustal  
358 method. Of the 215 divergent sequences included in the analysis, E ORF could be identified in 178 by  
359 homology with E ORFs previously annotated in NCBI. Of these 178 E ORFs, 7 were sequences  
360 isolated from humans and 96 were from bats; these sequences were selected for analysis. Phylogenetic  
361 reconstruction was performed using an unrooted maximum likelihood tree, with gamma distributed  
362 variation in rates between branches and 100 bootstraps (also in MEGA X).

363 **Statistical analyses.** Comparison to determine whether there was a statistically significant difference  
364 across groups was performed using a 1-way ANOVA in GraphPad Prism. Multi-way comparisons of  
365 CpG composition between groups were performed using Tukey's multiple comparisons test in  
366 GraphPad Prism. A 5% significance level was used throughout.

367

## 368 **Acknowledgements**

369 We would like to thank Prof. Peter Simmonds (Oxford University) for providing a pre-release version  
370 of SSE v1.4. We are grateful to Dr James Glover (the Roslin Institute) for comments on the  
371 manuscript. Figure 1 was created using BioRender. This work was supported by BBSRC Roslin  
372 Institute Strategic Program Grant funding (no. BB/P013740/1 to PD and FG) and Wellcome Trust/  
373 Royal Society Fellowship (211222/Z/18/Z to EG).

374 **Figures and legends.**

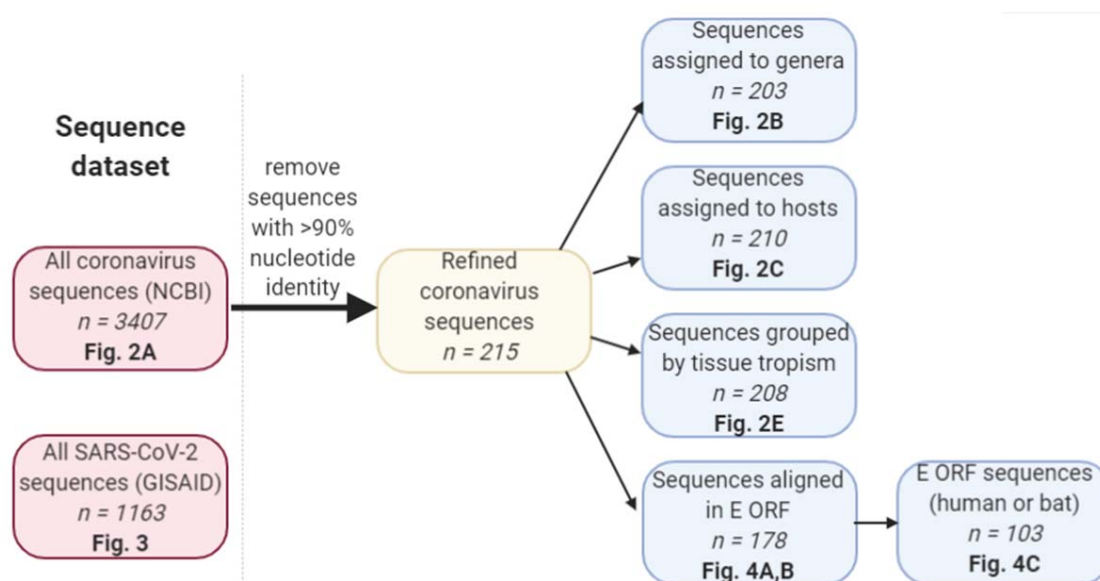

375  
376 **Figure 1. Workflow for sequence processing.** Two sequence datasets were used for analysis; all  
377 coronavirus complete genome sequences available on NCBI, and SARS-CoV-2 complete genome  
378 sequences available on the GISAID platform (left hand pink shaded boxes). The coronavirus complete  
379 genome sequences were cleaned by removal of sequences with 90% nucleotide identity or greater to  
380 remove epidemiologic biases, leaving 215 complete genome sequences (central yellow shaded box).  
381 These were then categorised by genera, host, and tissue tropism. The subset of 215 sequences were  
382 also aligned over the E ORF and grouped by host (blue shaded boxes). Each box firstly describes each  
383 dataset used, the number of sequences in that dataset is then indicated in *italicized* font, and the figure  
384 to which the dataset corresponds is indicated in **bold** font.

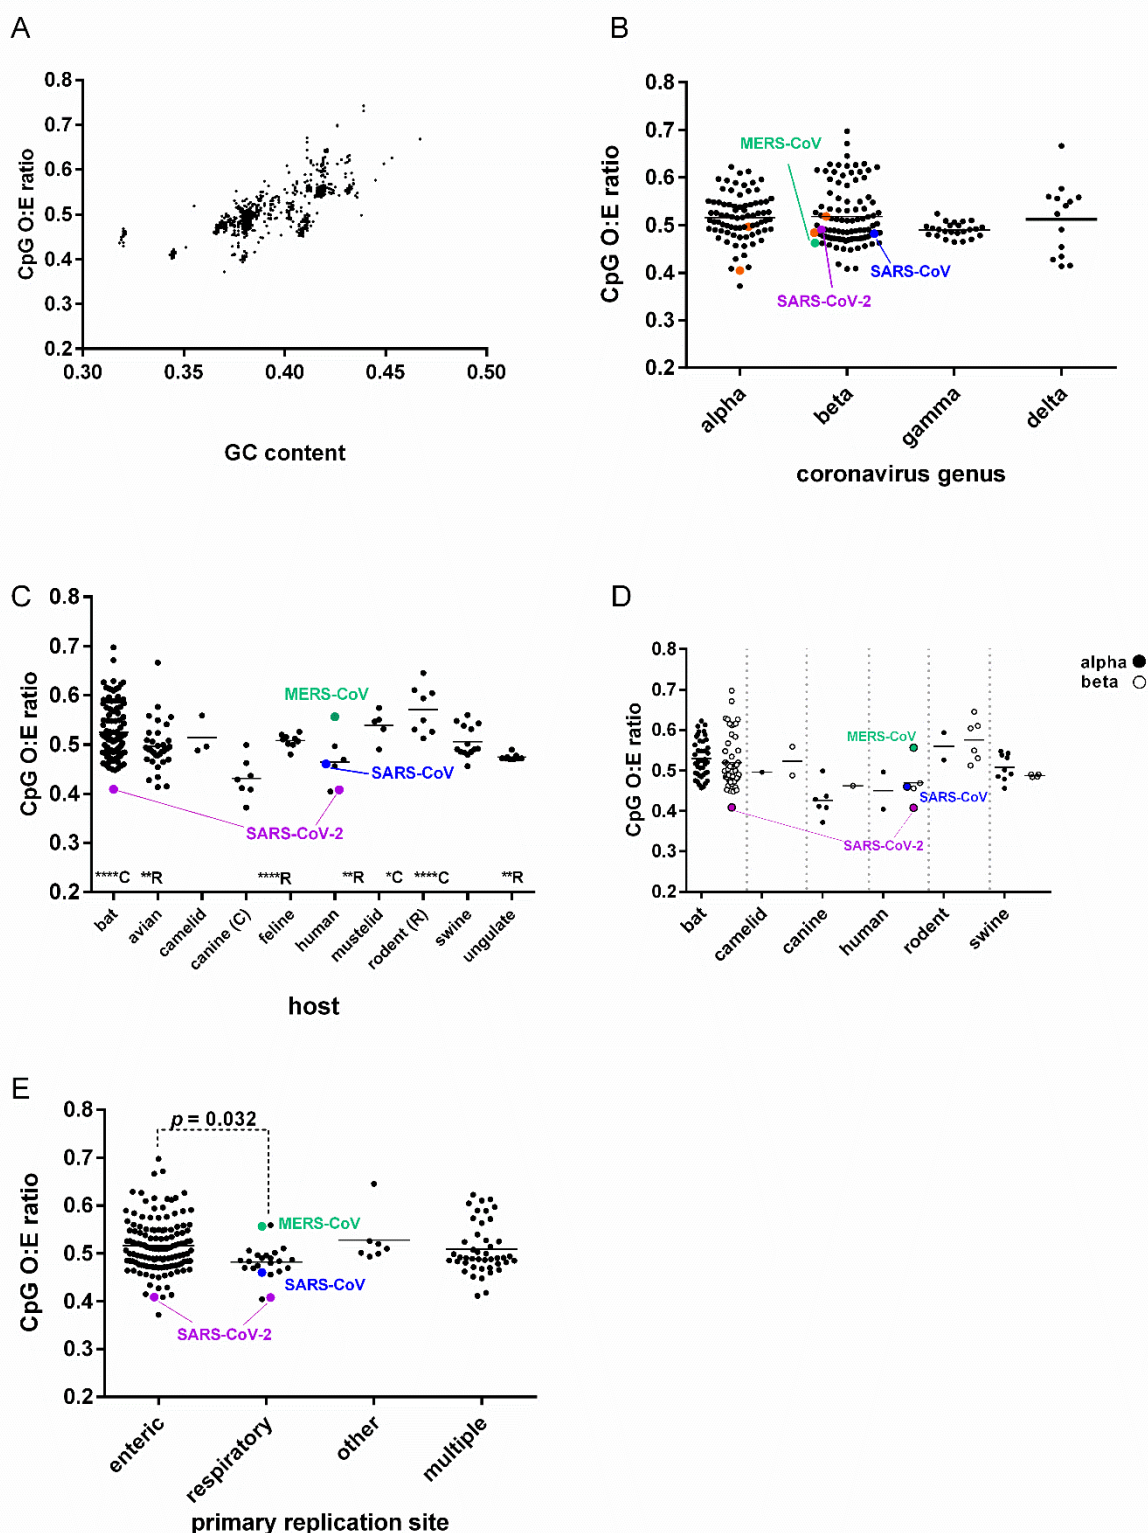

385

386 **Figure 2.** Comparison of the CpG ratios of complete genomes of coronaviruses. SARS-CoV is  
 387 represented by a blue circle, SARS-CoV-2 by a purple circle and MERS-CoV by a green circle  
 388 throughout. **A.** GC content versus CpG ratio for all complete genome sequences of coronaviruses  
 389 downloaded from Genbank (3407 sequences). The sequence dataset in (A) was then stripped to  
 390 include only one representative from sequences with less than 10% nucleotide diversity to overcome  
 391 epidemiologic biases (215 representative sequences), which were analysed in the subsequent sub-

392 figures. **B.** Coronavirus genus against genomic CpG content. Other human-infecting coronaviruses  
393 (HCoV-2292E, HCoV-NL63 (alphacoronaviruses) and HCoV-HKU1 and HCoV-OC43  
394 (betacoronaviruses) are represented using orange circles. **C.** Vertebrate host of coronavirus against  
395 genomic CpG content. Statistically significant differences between CpG compositions of viruses from  
396 different hosts are indicated above the x axis line, with 'C' denoting a statistically significant  
397 difference from canine coronaviruses and 'R' denoting a statistically significant difference from  
398 rodent coronaviruses. Tukey's multiple comparisons test was used to identify differences in CpG  
399 composition between viruses infecting different hosts. A  $p$  value  $< 0.05$  is indicated with \*,  $p < 0.01 =$   
400 \*\*,  $p < 0.001 =$  \*\*\* and  $p < 0.0001 =$  \*\*\*\*. **D.** Vertebrate host of coronavirus, with further sub-  
401 division into coronavirus genus, against genomic CpG content. Alphacoronaviruses are denoted with  
402 filled circles and betacoronaviruses with open circles. **E.** Primary replication site against genomic  
403 CpG content by host. Tukey's multiple comparisons test was used to identify differences in CpG  
404 composition between viruses infecting different tissues. For a full breakdown of how these were  
405 assigned, please refer to **Table S1**.

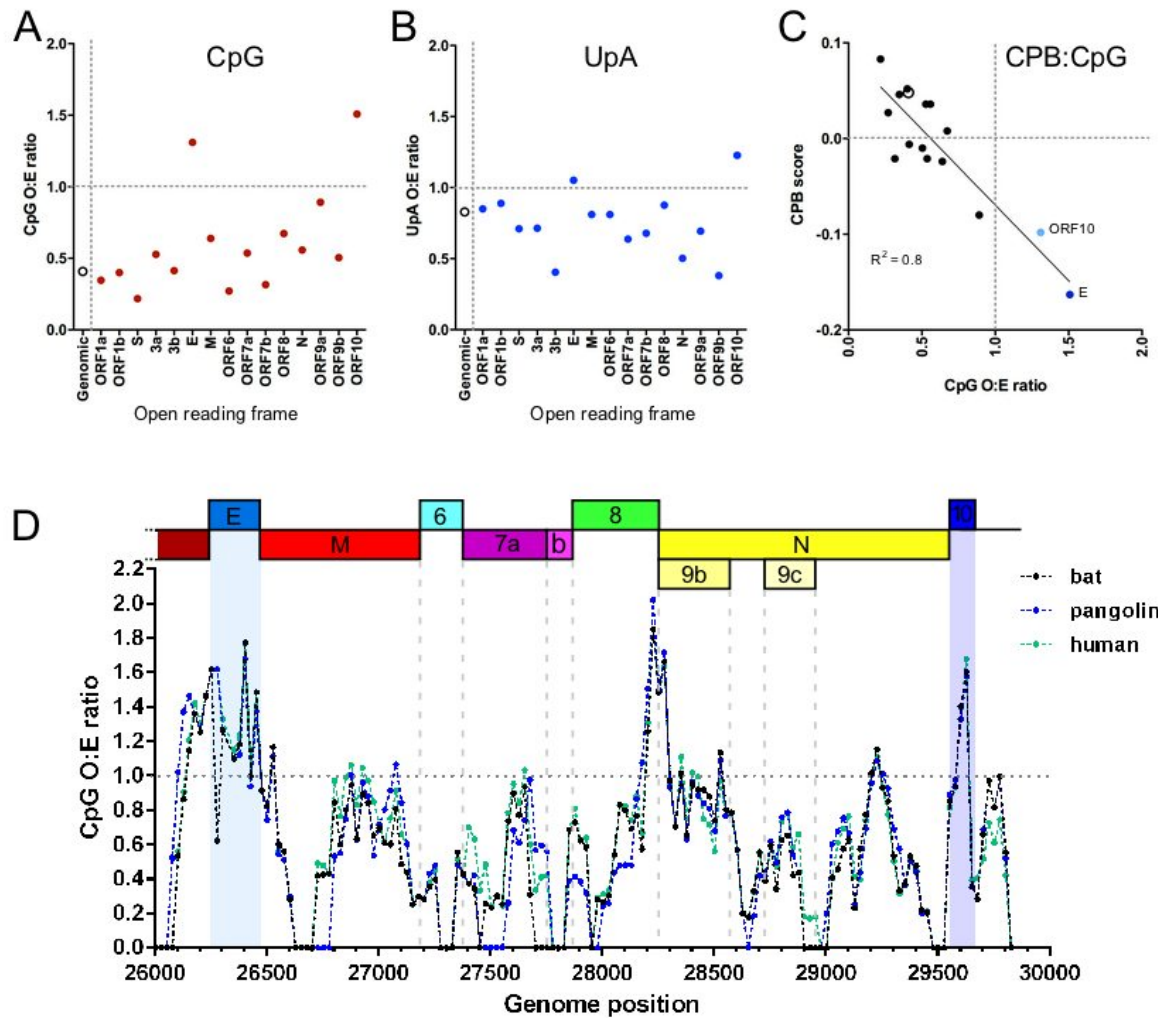

406

407 **Figure 3.** Heterogeneities in the dinucleotide composition of the SARS-CoV-2 genome. **A-C.**  
 408 Comparison of the dinucleotide and coding compositions of SARS-CoV-2 open reading frames  
 409 (ORFs) for **A.** CpG observed: expected (O:E) ratios, **B.** UpA O:E ratios and **C.** Codon pair bias (CPB)  
 410 scores. Average scores across the genome are indicated using open circles. **D.** Sliding window  
 411 analysis of CpG content of SARS-CoV-2 (green line) and closely related bat (black line) and pangolin  
 412 (purple line) isolates. The CpG O:E ratio of the 3' end of the genome was measured in 100 nucleotide  
 413 windows in 25 nucleotide increments. The mean of 1163 complete genome sequences is presented for  
 414 SARS-CoV-2.

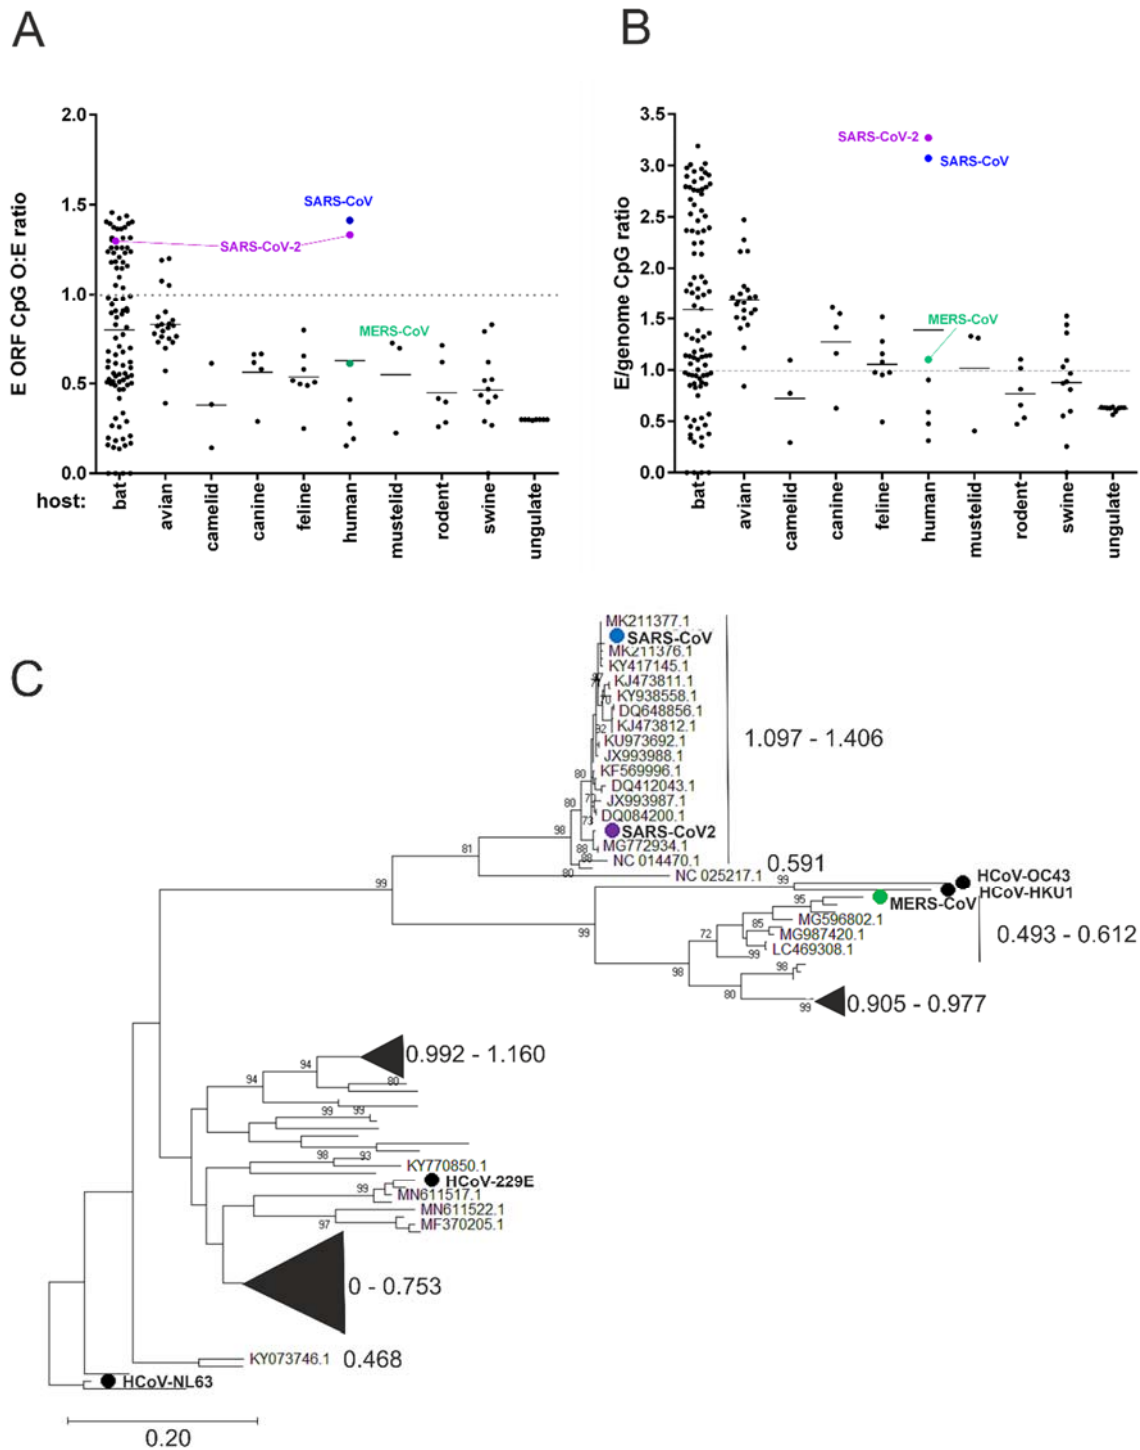

415

416 **Figure 4.** Evolutionary conservation of E ORF CpG content. MERS-CoV (green circle), SARS-CoV  
 417 (blue circle) and SARS-CoV-2 (green circle) are indicated in both panels. **A.** Virus-dependent  
 418 variation in E ORF CpG frequency. CpG O:E ratios for E ORF for 178 coronavirus E ORFs are  
 419 plotted by host. **B.** CpG O:E ratios for E ORF were divided by the genomic CpG O:E ratio for 178  
 420 coronavirus sequences and grouped by host. **C.** Phylogenetic reconstruction of E ORF of human and  
 421 bat coronaviruses. Maximum composite likelihood tree (100 bootstraps) representing the seven  
 422 human-infecting coronaviruses (HCoV-229E, HCoV-HKU1, HCoV-NL63, HCoV-OC43 (all black  
 423 circles) and 96 bat coronaviruses for which E ORF could be identified by alignment with the human  
 424 coronaviruses. CpG O:E ratios for the E gene are indicated by large font numbers, and the sequences

425 to which they relate are either bracketed or represented by triangles scaled to indicate the number of  
426 sequences they represent.

## 427 **References**

428

429 Atkinson N, Witteveldt J, Evans D, Simmonds P. 2014. The influence of CpG and UpA dinucleotide  
430 frequencies on RNA virus replication and characterization of the innate cellular pathways underlying  
431 virus attenuation and enhanced replication. *Nucleic Acids Research* 42:4527-4545.

432 Azhar EI, El-Kafrawy SA, Farraj SA, Hassan AM, Al-Saeed MS, Hashem AM, Madani TA. 2014. Evidence  
433 for Camel-to-Human Transmission of MERS Coronavirus. 370:2499-2505.

434 Banerjee A, Kulcsar K, Misra V, Frieman M, Mossman K. 2019. Bats and Coronaviruses. *Viruses* 11:41.

435 Berkhout B, van Hemert F. 2015. On the biased nucleotide composition of the human coronavirus  
436 RNA genome. *Virus Research* 202:41-47.

437 Burns CC, Campagnoli R, Shaw J, Vincent A, Jorba J, Kew O. 2009. Genetic Inactivation of Poliovirus  
438 Infectivity by Increasing the Frequencies of CpG and UpA Dinucleotides within and across  
439 Synonymous Capsid Region Codons. 83:9957-9969.

440 Chenik M, Chebli K, Blondel D. 1995. Translation initiation at alternate in-frame AUG codons in the  
441 rabies virus phosphoprotein mRNA is mediated by a ribosomal leaky scanning mechanism. 69:707-  
442 712.

443 Cooper DN, Krawczak M. 1989. Cytosine methylation and the fate of CpG dinucleotides in vertebrate  
444 genomes. *Human Genetics* 83:181-188.

445 Cotten M, Lam TT, Watson SJ, Palser AL, Petrova V, Grant P, Pybus OG, Rambaut A, Guan Y, Pillay D,  
446 et al. 2013. Full-genome deep sequencing and phylogenetic analysis of novel human  
447 betacoronavirus. *Emerging infectious diseases* 19:736-742B.

448 Cox E, Hooyberghs J, Pensaert MB. 1990. Sites of replication of a porcine respiratory coronavirus  
449 related to transmissible gastroenteritis virus. *Research in veterinary science* 48:165-169.

450 Davidson A, Williamson MK, Lewis S, Shoemark D, Carroll M, Heesom K, Zambon M, Ellis J, Lewis P,  
451 Hiscox J, et al. 2020. Characterisation of the transcriptome and proteome of SARS-CoV-2 using direct  
452 RNA sequencing and tandem mass spectrometry reveals evidence for a cell passage induced in-  
453 frame deletion in the spike glycoprotein that removes the furin-like cleavage site. In: bioRxiv.

454 Deaton AM, Bird A. 2011. CpG islands and the regulation of transcription. 25:1010-1022.

455 Dev RR, Ganji R, Singh SP, Mahalingam S, Banerjee S, Khosla S. 2017. Cytosine methylation by  
456 DNMT2 facilitates stability and survival of HIV-1 RNA in the host cell during infection. *Biochemical*  
457 *Journal* 474:2009-2026.

458 Ficarelli M, Wilson H, Pedro Galão R, Mazzon M, Antzin-Anduetza I, Marsh M, Neil SJD, Swanson CM.  
459 2019. KHNYN is essential for the zinc finger antiviral protein (ZAP) to restrict HIV-1 containing  
460 clustered CpG dinucleotides. *eLife* 8:e46767.

461 Firth AE, Atkins JF. 2010. Candidates in Astroviruses, Seadornaviruses, Cytorhabdoviruses and  
462 Coronaviruses for +1 frame overlapping genes accessed by leaky scanning. *Virology Journal* 7:17.

463 Fitch B, Gorbatshevych O, Shen SH, Stauff CB, Song Y, Wang B, Leatherwood J, Gardin J, Yurovsky A,  
464 Mueller S, et al. 2015. Reply to Simmonds et al.: Codon pair and dinucleotide bias have not been  
465 functionally distinguished. 112:E3635-E3636.

466 Gaunt E, Wise HM, Zhang H, Lee LN, Atkinson NJ, Nicol MQ, Highton AJ, Klenerman P, Beard PM,  
467 Dutia BM, et al. 2016. Elevation of CpG frequencies in influenza A genome attenuates pathogenicity  
468 but enhances host response to infection. *eLife* 5:e12735-e12735.

469 Greenbaum BD, Levine AJ, Bhanot G, Rabadan R. 2008. Patterns of evolution and host gene mimicry  
470 in influenza and other RNA viruses. *PLOS Pathogens* 4:e1000079-e1000079.

471 Groenke N, Trimpert J, Merz S, Conradie AM, Wyler E, Zhang H, Hazapis O-G, Rausch S, Landthaler  
472 M, Osterrieder N, et al. 2020. Mechanism of Virus Attenuation by Codon Pair Deoptimization. *Cell*  
473 *Reports* 31:107586.

474 Guo X, Ma J, Sun J, Gao G. 2007. The zinc-finger antiviral protein recruits the RNA processing  
475 exosome to degrade the target mRNA. 104:151-156.



- 476 Gutman GA, Hatfield GW. 1989. Nonrandom utilization of codon pairs in *Escherichia coli*. 86:3699-  
477 3703.
- 478 Hiscott J, Kwon H, Génin P. 2001. Hostile takeovers: viral appropriation of the NF- $\kappa$ B pathway. *The*  
479 *Journal of Clinical Investigation* 107:143-151.
- 480 Hu B, Ge X, Wang L-F, Shi Z. 2015. Bat origin of human coronaviruses. *Virology Journal* 12:221.
- 481 Irigoyen N, Firth AE, Jones JD, Chung BYW, Siddell SG, Brierley I. 2016. High-Resolution Analysis of  
482 Coronavirus Gene Expression by RNA Sequencing and Ribosome Profiling. *PLOS Pathogens*  
483 12:e1005473-e1005473.
- 484 Kanaya S, Yamada Y, Kinouchi M, Kudo Y, Ikemura T. 2001. Codon Usage and tRNA Genes in  
485 Eukaryotes: Correlation of Codon Usage Diversity with Translation Efficiency and with CG-  
486 Dinucleotide Usage as Assessed by Multivariate Analysis. *Journal of Molecular Evolution* 53:290-298.
- 487 Khoddami V, Cairns BR. 2013. Identification of direct targets and modified bases of RNA cytosine  
488 methyltransferases. *Nature Biotechnology* 31:458-464.
- 489 Kim D, Lee J-Y, Yang J-S, Kim JW, Kim VN, Chang H. 2020. The architecture of SARS-CoV-2  
490 transcriptome.2020.2003.2012.988865.
- 491 Kozak M. 1986. Point mutations define a sequence flanking the AUG initiator codon that modulates  
492 translation by eukaryotic ribosomes. *Cell* 44:283-292.
- 493 Kumar S, Stecher G, Li M, Knyaz C, Tamura K. 2018. MEGA X: Molecular Evolutionary Genetics  
494 Analysis across Computing Platforms. *Molecular Biology and Evolution* 35:1547-1549.
- 495 Kunec D, Osterrieder N. 2016. Codon Pair Bias Is a Direct Consequence of Dinucleotide Bias. *Cell*  
496 *Reports* 14:55-67.
- 497 Liao CL, Lai MM. 1994. Requirement of the 5'-end genomic sequence as an upstream cis-acting  
498 element for coronavirus subgenomic mRNA transcription. 68:4727-4737.
- 499 Lin C-G, Lo SJ. 1992. Evidence for involvement of a ribosomal leaky scanning mechanism in the  
500 translation of the hepatitis B virus Pol gene from the viral pregenome RNA. *Virology* 188:342-352.
- 501 Lin Y-T, Chiweshe S, McCormick D, Raper A, Wickenhagen A, DeFillipis V, Gaunt E, Simmonds P,  
502 Wilson SJ, Grey F. 2020. Human cytomegalovirus evades ZAP detection by suppressing CpG  
503 dinucleotides in the major immediate early genes.2020.2001.2007.897132.
- 504 Lu R, Zhao X, Li J, Niu P, Yang B, Wu H, Wang W, Song H, Huang B, Zhu N, et al. 2020. Genomic  
505 characterisation and epidemiology of 2019 novel coronavirus: implications for virus origins and  
506 receptor binding. *The Lancet* 395:565-574.
- 507 Marra MA, Jones SJM, Astell CR, Holt RA, Brooks-Wilson A, Butterfield YSN, Khattra J, Asano JK,  
508 Barber SA, Chan SY, et al. 2003. The Genome Sequence of the SARS-Associated Coronavirus.  
509 300:1399-1404.
- 510 McClelland M, Ivarie R. 1982. Asymmetrical distribution of CpG in an 'average' mammalian gene.  
511 *Nucleic Acids Research* 10:7865-7877.
- 512 Medvedeva YA, Khamis AM, Kulakovskiy IV, Ba-Alawi W, Bhuyan MSI, Kawaji H, Lassmann T, Harbers  
513 M, Forrest ARR, Bajic VB, et al. 2014. Effects of cytosine methylation on transcription factor binding  
514 sites. *BMC Genomics* 15:119.
- 515 Moratorio G, Henningsson R, Barbezange C, Carrau L, Bordería AV, Blanc H, Beaucourt S, Poirier EZ,  
516 Vallet T, Boussier J, et al. 2017. Attenuation of RNA viruses by redirecting their evolution in sequence  
517 space. *Nature Microbiology* 2:17088.
- 518 O'Connor JB, Brian DA. 2000. Downstream Ribosomal Entry for Translation of Coronavirus TGEV  
519 Gene 3b. *Virology* 269:172-182.
- 520 Odon V, Fros JJ, Goonawardane N, Dietrich I, Ibrahim A, Alshaihahmed K, Nguyen D, Simmonds P.  
521 2019. The role of ZAP and OAS3/RNaseL pathways in the attenuation of an RNA virus with elevated  
522 frequencies of CpG and UpA dinucleotides. *Nucleic Acids Research* 47:8061-8083.
- 523 Perlman S, Netland J. 2009. Coronaviruses post-SARS: update on replication and pathogenesis.  
524 *Nature Reviews Microbiology* 7:439-450.
- 525 Rasschaert D, Duarte M, Laude H. 1990. Porcine respiratory coronavirus differs from transmissible  
526 gastroenteritis virus by a few genomic deletions. 71:2599-2607.

- 527 Rima BK, McFerran NV. 1997. Dinucleotide and stop codon frequencies in single-stranded RNA  
528 viruses. 78:2859-2870.
- 529 Rota PA, Oberste MS, Monroe SS, Nix WA, Campagnoli R, Icenogle JP, Peñaranda S, Bankamp B,  
530 Maher K, Chen M-h, et al. 2003. Characterization of a Novel Coronavirus Associated with Severe  
531 Acute Respiratory Syndrome. 300:1394-1399.
- 532 Ryabova LA, Pooggin MM, Hohn T. 2006. Translation reinitiation and leaky scanning in plant viruses.  
533 Virus Research 119:52-62.
- 534 Sawicki SG, Sawicki DL. 1998. A New Model for Coronavirus Transcription. In: Enjuanes L, Siddell SG,  
535 Spaan W, editors. Coronaviruses and Arteriviruses. Boston, MA: Springer US. p. 215-219.
- 536 Sawicki SG, Sawicki DL, Siddell SG. 2007. A Contemporary View of Coronavirus Transcription. 81:20-  
537 29.
- 538 Schaecher SR, Mackenzie JM, Pekosz A. 2007. The ORF7b Protein of Severe Acute Respiratory  
539 Syndrome Coronavirus (SARS-CoV) Is Expressed in Virus-Infected Cells and Incorporated into SARS-  
540 CoV Particles. 81:718-731.
- 541 Schneider PA, Kim R, Lipkin WI. 1997. Evidence for translation of the Borna disease virus G protein by  
542 leaky ribosomal scanning and ribosomal reinitiation. 71:5614-5619.
- 543 Senanayake SD, Brian DA. 1997. Bovine coronavirus I protein synthesis follows ribosomal scanning  
544 on the bicistronic N mRNA. Virus Research 48:101-105.
- 545 Shi J, Wen Z, Zhong G, Yang H, Wang C, Huang B, Liu R, He X, Shuai L, Sun Z, et al. 2020. Susceptibility  
546 of ferrets, cats, dogs, and other domesticated animals to SARS–coronavirus 2.eabb7015.
- 547 Simmonds P. 2012. SSE: a nucleotide and amino acid sequence analysis platform. BMC Research  
548 Notes 5:50.
- 549 Simmonds P, Xia W, Baillie JK, McKinnon K. 2013. Modelling mutational and selection pressures on  
550 dinucleotides in eukaryotic phyla –selection against CpG and UpA in cytoplasmically expressed RNA  
551 and in RNA viruses. BMC Genomics 14:610.
- 552 Squires JE, Patel HR, Nusch M, Sibbritt T, Humphreys DT, Parker BJ, Suter CM, Preiss T. 2012.  
553 Widespread occurrence of 5-methylcytosine in human coding and non-coding RNA. Nucleic Acids  
554 Research 40:5023-5033.
- 555 Sved J, Bird A. 1990. The expected equilibrium of the CpG dinucleotide in vertebrate genomes under  
556 a mutation model. 87:4692-4696.
- 557 Takata MA, Gonçalves-Carneiro D, Zang TM, Soll SJ, York A, Blanco-Melo D, Bieniasz PD. 2017. CG  
558 dinucleotide suppression enables antiviral defence targeting non-self RNA. Nature 550:124-127.
- 559 Tang Q, Wang X, Gao G. 2017. The Short Form of the Zinc Finger Antiviral Protein Inhibits Influenza A  
560 Virus Protein Expression and Is Antagonized by the Virus-Encoded NS1. 91:e01909-01916.
- 561 Tats A, Tenson T, Remm M. 2008. Preferred and avoided codon pairs in three domains of life. BMC  
562 Genomics 9:463.
- 563 Tomso DJ, Bell DA. 2003. Sequence Context at Human Single Nucleotide Polymorphisms:  
564 Overrepresentation of CpG Dinucleotide at Polymorphic Sites and Suppression of Variation in CpG  
565 Islands. Journal of Molecular Biology 327:303-308.
- 566 Tulloch F, Atkinson NJ, Evans DJ, Ryan MD, Simmonds P. 2014. RNA virus attenuation by codon pair  
567 deoptimisation is an artefact of increases in CpG/UpA dinucleotide frequencies. eLife 3:e04531.
- 568 van der Hoek L, Pyrc K, Jebbink MF, Vermeulen-Oost W, Berkhout RJM, Wolthers KC, Wertheim-van  
569 Dillen PME, Kaandorp J, Spaargaren J, Berkhout B. 2004. Identification of a new human coronavirus.  
570 Nature Medicine 10:368-373.
- 571 Vlasova AN, Wang Q, Jung K, Langel SN, Malik YS, Saif LJ. 2020. Porcine Coronaviruses. Emerging and  
572 Transboundary Animal Viruses:79-110.
- 573 Wise HM, Barbezange C, Jagger BW, Dalton RM, Gog JR, Curran MD, Taubenberger JK, Anderson EC,  
574 Digard P. 2011. Overlapping signals for translational regulation and packaging of influenza A virus  
575 segment 2. Nucleic Acids Research 39:7775-7790.

576 Woo PCY, Lau SKP, Chu C-m, Chan K-h, Tsoi H-w, Huang Y, Wong BHL, Poon RWS, Cai JJ, Luk W-k, et  
577 al. 2005. Characterization and Complete Genome Sequence of a Novel Coronavirus, Coronavirus  
578 HKU1, from Patients with Pneumonia. 79:884-895.  
579 Woo PCY, Wong BHL, Huang Y, Lau SKP, Yuen K-Y. 2007. Cytosine deamination and selection of CpG  
580 suppressed clones are the two major independent biological forces that shape codon usage bias in  
581 coronaviruses. *Virology* 369:431-442.  
582 Xia X. 2020. Extreme genomic CpG deficiency in SARS-CoV-2 and evasion of host antiviral defense.  
583 *Molecular Biology and Evolution*.  
584 Xie L, Lu B, Zheng Z, Miao Y, Liu Y, Zhang Y, Zheng C, Ke X, Hu Q, Wang H. 2018. The 3C protease of  
585 enterovirus A71 counteracts the activity of host zinc-finger antiviral protein (ZAP). 99:73-85.  
586 Zaki AM, van Boheemen S, Bestebroer TM, Osterhaus ADME, Fouchier RAM. 2012. Isolation of a  
587 Novel Coronavirus from a Man with Pneumonia in Saudi Arabia. 367:1814-1820.  
588 Zhu N, Zhang D, Wang W, Li X, Yang B, Song J, Zhao X, Huang B, Shi W, Lu R, et al. 2020. A Novel  
589 Coronavirus from Patients with Pneumonia in China, 2019. *New England Journal of Medicine*  
590 382:727-733.

591
